# Supplementary material
Source: publisher figshare collection journal article supplement (https://sage.figshare.com/ndownloader/files/32394708)
Supplement: Supplementary file 1 [file 32394708]

## Sheet: Sheet1
Zero-Order Correlations, Means and Standard Deviations of Variables in Confirmatory Factor Analyses (N = 319 listwise)
	Cleaning and Disinfecting					Social Distancing					Handwashing					Wearing Face Masks
	EF-c	DN-c	IN-c	BI-c	BEH-c	EF-s	DN-s	IN-s	BI-s	BEH-s	EF-h	DN-h	IN-h	BI-h	BEH-HW	EF-f	DN-f	IN-f	BI-f	BEH-FM	RP
EF-c
DN-c	0.734258
IN-c	0.640506	0.668858
BI-c	0.802475	0.691243	0.678319
BEH-c	0.588483	0.554228	0.489282	0.624369
EF-s	0.738089	0.519365	0.459767	0.627216	0.375466
DN-s	0.660588	0.659557	0.5382	0.654891	0.418731	0.708489
IN-s	0.403012	0.423226	0.615723	0.423412	0.239191	0.426486	0.506597
BI-s	0.618951	0.435378	0.446474	0.648918	0.407698	0.794461	0.605084	0.475968
BEH-s	0.588074	0.449323	0.40051	0.589759	0.500726	0.643422	0.595352	0.327143	0.593662
EF-h	0.766033	0.551522	0.475111	0.704099	0.499184	0.642146	0.50234	0.286352	0.599508	0.498829
DN-h	0.647072	0.653675	0.537259	0.638156	0.472546	0.509137	0.65159	0.356863	0.455868	0.439078	0.683534
IN-h	0.599569	0.496497	0.723613	0.587486	0.378786	0.475919	0.482877	0.605976	0.474689	0.377559	0.607257	0.6518
BI-h	0.669659	0.538119	0.42807	0.698915	0.420481	0.556202	0.494185	0.255427	0.605873	0.504909	0.749889	0.599607	0.54387
BEH-HW	0.499573	0.428701	0.337868	0.564007	0.682113	0.355496	0.363836	0.184511	0.396132	0.525317	0.555377	0.483097	0.338186	0.503308
EF-f	0.659849	0.474142	0.360769	0.5701	0.34268	0.754154	0.602058	0.362984	0.661058	0.543686	0.597684	0.450784	0.465743	0.587518	0.403252
DN-f	0.575912	0.568079	0.460458	0.595625	0.419781	0.597409	0.729099	0.376432	0.532095	0.546572	0.47695	0.603761	0.458093	0.455902	0.433862	0.70505
IN-f	0.55244	0.537158	0.602255	0.593733	0.359782	0.609008	0.691784	0.627005	0.616025	0.517114	0.501188	0.560937	0.643715	0.47304	0.385354	0.671925	0.801934
BI-f	0.592045	0.416995	0.414432	0.588229	0.324844	0.705082	0.578128	0.402841	0.725183	0.550518	0.524503	0.418997	0.461362	0.547611	0.354564	0.818839	0.734136	0.74498
BEH-FM	0.378613	0.333391	0.28971	0.404391	0.373369	0.444988	0.4481	0.28769	0.46689	0.538566	0.362401	0.367345	0.328216	0.317503	0.451577	0.562203	0.654069	0.568306	0.663214
RP	0.346325	0.260303	0.226509	0.3192	0.172442	0.3523	0.269751	0.240362	0.346053	0.36002	0.304413	0.227694	0.339462	0.370455	0.192354	0.42736	0.331455	0.35961	0.396986	0.259543
M	5.82	5.39	5.1	5.84		5.84
SD	1.03	1.3	1.32	1.05
Note: EF-c = efficacy beliefs of cleaning and disinfecting. DN-c = descriptive norms of cleaning and disinfecting. IN-c = injunctive norms of cleaning and disinfecting. BI-c = behavioral intention of cleaning and disinfecting. EF-s = efficacy beliefs of social distancing. DN-s = descriptive norms of social distancing. IN-s = injunctive norms of social distancing. BI-s = behavioral intention of so…
